# Supplementary material for: High expression of PIMREG predicts poor survival outcomes and is correlated with immune infiltrates in lung adenocarcinoma
Source: PeerJ journal article supplement (doi:10.7717/peerj.11697), 2021-07-06

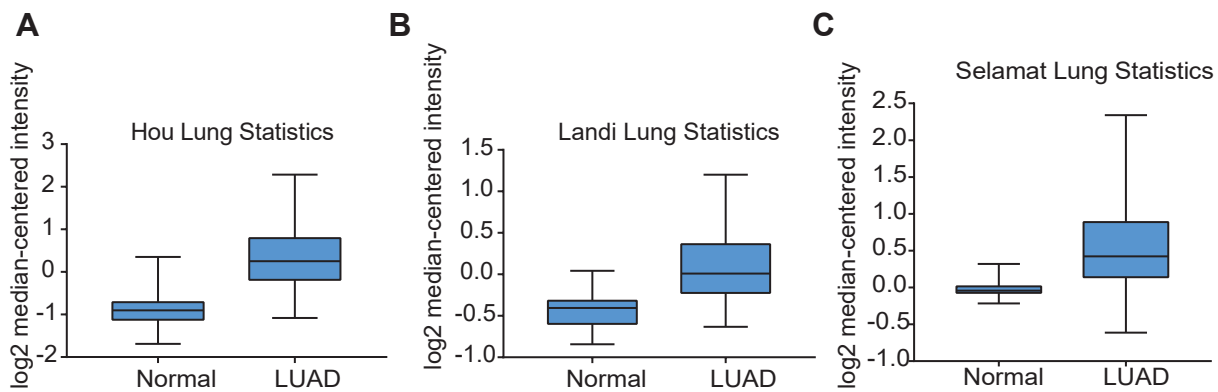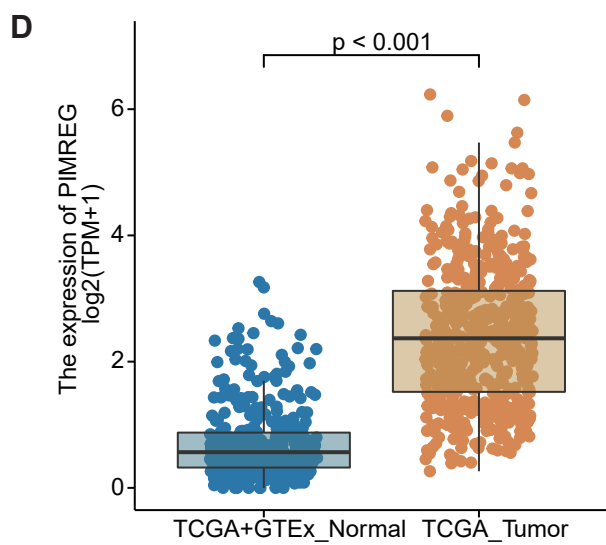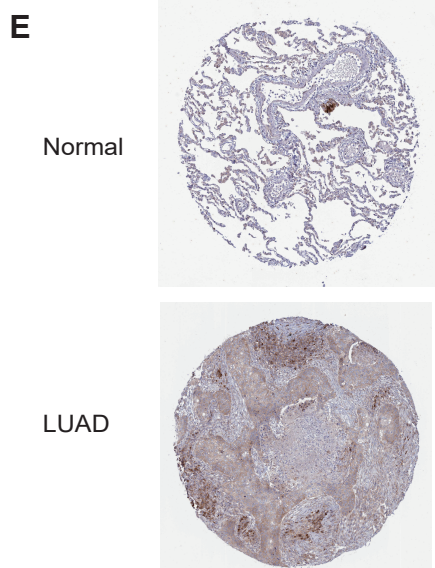

Supplement: s1.pdf [file s1.pdf]
