# Supplementary material for: High expression of PIMREG predicts poor survival outcomes and is correlated with immune infiltrates in lung adenocarcinoma
Source: PeerJ. 2021 Jul 6;9:e11697. doi: 10.7717/peerj.11697 (PMC8269662; doi:10.7717/peerj.11697)
Supplement: Supplemental Information 4 [file peerj-09-11697-s004.xlsx]

## Sheet: Sheet1
	actin	PIMREG
BEAS-2B	15.7344	23.3365
	15.4321	23.4933
	13.8312	23.6137
H1299	22.5789	30.124
	22.8722	29.8749
	23.402	29.7665
A549	13.5899	20.1473
	13.6979	20.0234
	13.6293	19.9314
